# Supplementary material for: Interaction of ammonia borane with Li2NH and Li3N
Source: Royal Society of Chemistry journal article supplement (doi:10.1039/b916994f), 2009-10-15
Supplement: b916994f.pdf [file b916994f.pdf]

**Selective binding of benzenediol derivatives by simultaneous non-covalent interactions in bis-Pt(II)  
aza-aromatic host-guest system**

Robert Trokowski, Shigehisa Akine, Tatsuya Nabeshima\*

Graduate School of Pure and Applied Sciences, University of Tsukuba,  
Tennodai 1-1-1 Tsukuba, Ibaraki 305-8571, Japan  
nabesima@chem.tsukuba.ac.jp

**Supporting information**

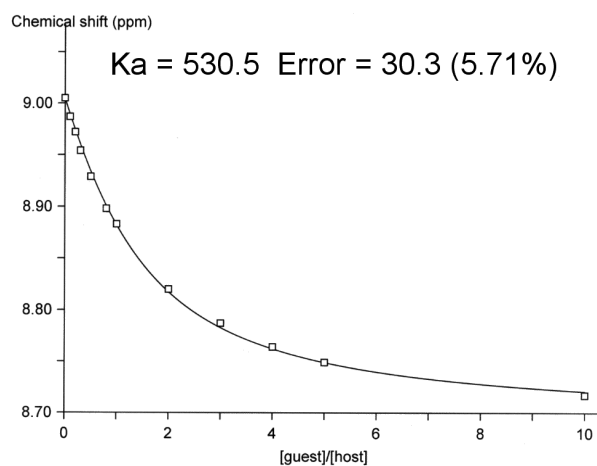

**Fig. S1** Fit plot for the  $^1\text{H}$  NMR titration of  $1 \cdot \text{BF}_4$  with benzene-1,4-diol.  $[1 \cdot \text{BF}_4] = 2 \text{ mM}$ ,  $\text{DMSO-}d_6$ ,  $25 \text{ }^\circ\text{C}$ .

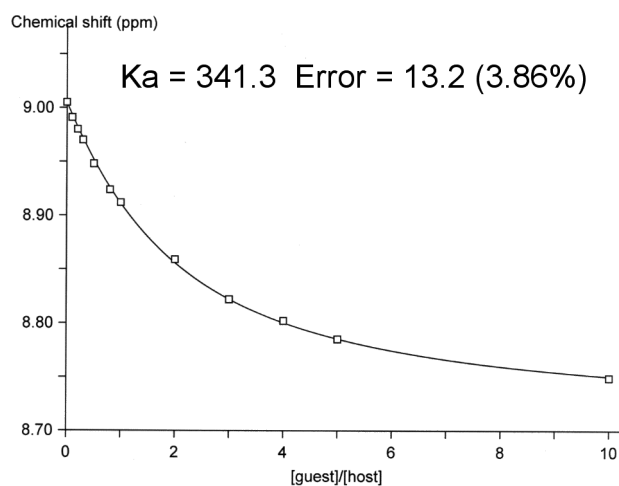

**Fig. S2** Fit plot for the  $^1\text{H}$  NMR titration of  $1 \cdot \text{BF}_4$  with benzene-1,3-diol.  $[1 \cdot \text{BF}_4] = 2 \text{ mM}$ ,  $\text{DMSO-}d_6$ ,  $25 \text{ }^\circ\text{C}$ .

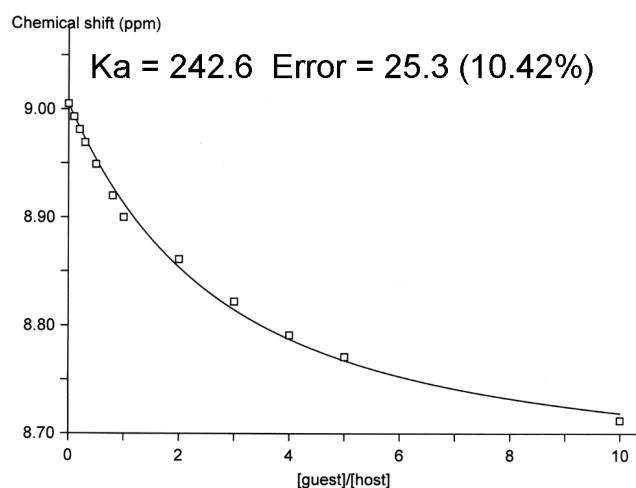

**Fig. S3** Fit plot for the  $^1\text{H}$  NMR titration of  $1\cdot\text{BF}_4$  with benzene-1,2-diol.  $[1\cdot\text{BF}_4] = 2$  mM,  $\text{DMSO-}d_6$ ,  $25^\circ\text{C}$ .

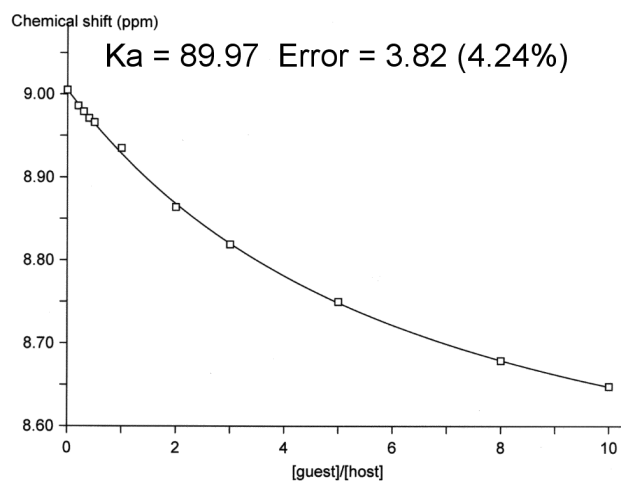

**Fig. S4** Fit plot for the  $^1\text{H}$  NMR titration of  $1\cdot\text{BF}_4$  with 2-chloronaphthalene.  $[1\cdot\text{BF}_4] = 2$  mM,  $\text{DMSO-}d_6$ ,  $25^\circ\text{C}$ .

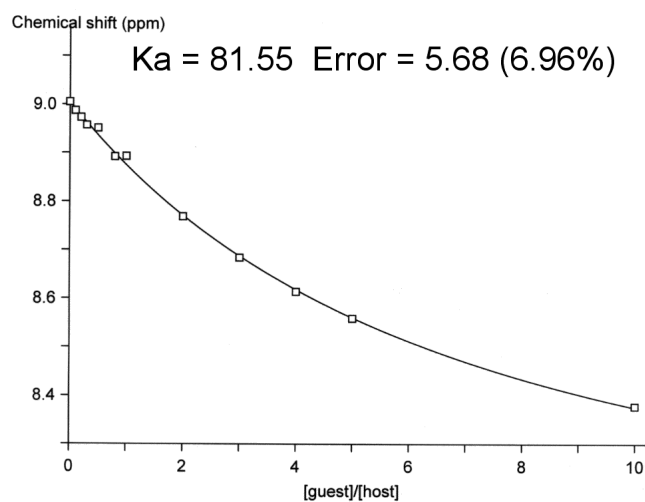

**Fig. S5** Fit plot for the  $^1\text{H}$  NMR titration of  $1\cdot\text{BF}_4$  with pyrene.  $[1\cdot\text{BF}_4] = 2$  mM,  $\text{DMSO-}d_6$ ,  $25^\circ\text{C}$ .

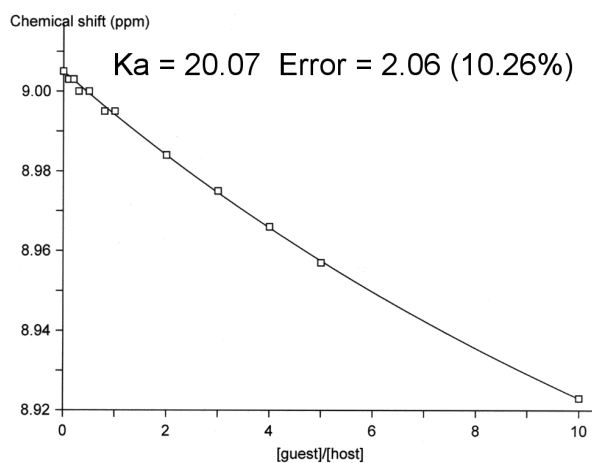

**Fig. S6** Fit plot for the  $^1\text{H}$  NMR titration of  $1\text{-BF}_4$  with 1,4-dichlorobenzene.  $[1\text{-BF}_4] = 2$  mM,  $\text{DMSO-}d_6$ ,  $25^\circ\text{C}$ .

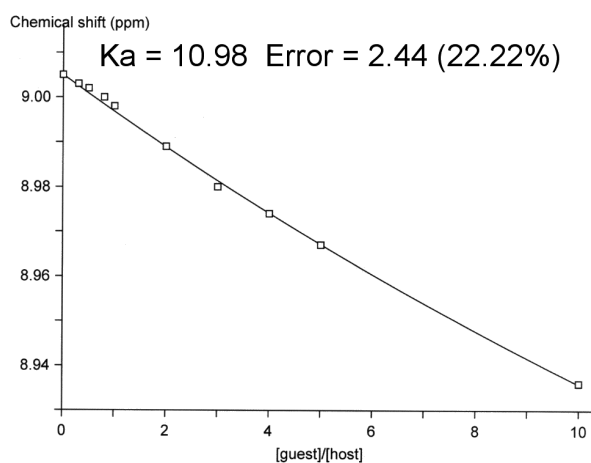

**Fig. S7** Fit plot for the  $^1\text{H}$  NMR titration of  $1\text{-BF}_4$  with 1,2-dichlorobenzene.  $[1\text{-BF}_4] = 2$  mM,  $\text{DMSO-}d_6$ ,  $25^\circ\text{C}$ .

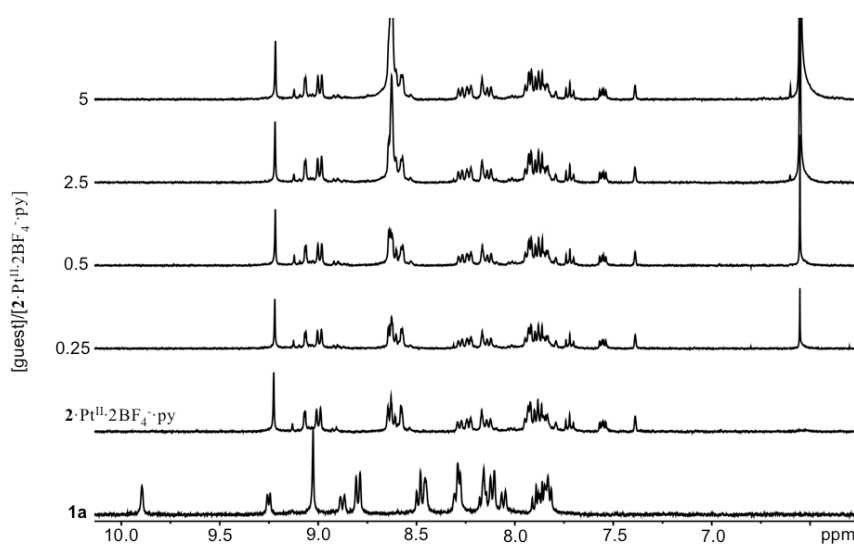

**Fig. S8** Titration of  $2\text{-Pt}^{\text{II}}\cdot 2\text{BF}_4\cdot\text{py}$  with benzene-1,4-diol ( $[2\text{-Pt}^{\text{II}}\cdot 2\text{BF}_4\cdot\text{py}] = 2$  mM,  $\text{DMSO-}d_6/(0.75\%$  pyridine- $d_5$ ),  $25^\circ\text{C}$ ).

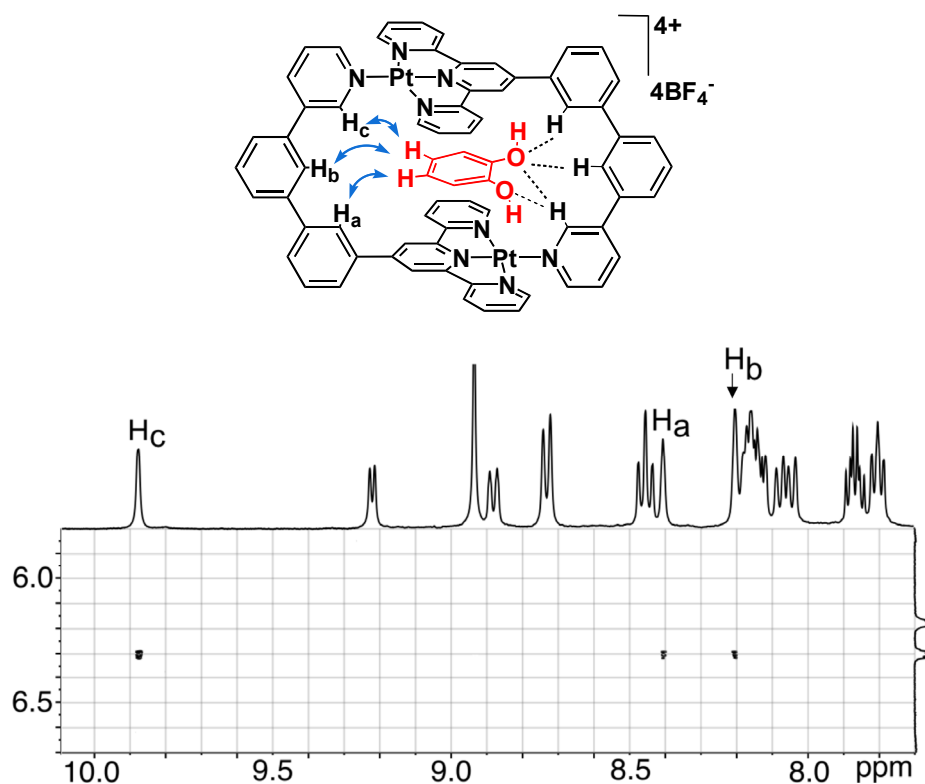

**Fig. S9** Portion of the <sup>1</sup>H NOESY spectrum of a mixture of **1**·BF<sub>4</sub> with benzene-1,2-diol ([**1**·BF<sub>4</sub>] = 9 mM, [benzene-1,2-diol] = 3 mM in DMSO-*d*<sub>6</sub>, at 25 °C with a mixing time of 2.0 sec. The assignment and illustration of observed intermolecular NOE cross peaks are also reported.

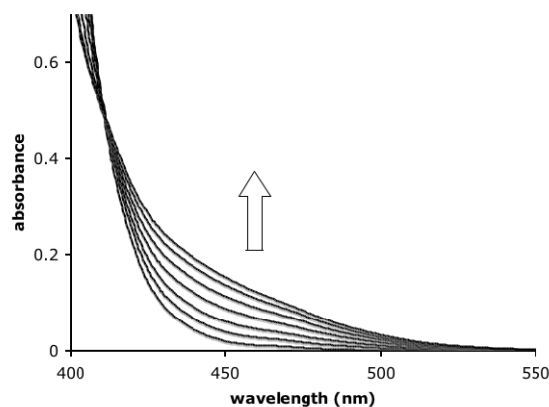

**Fig. S10** Portion of the UV-vis titration of **1**·BF<sub>4</sub> ([**1**·BF<sub>4</sub>] = 2 mM) by addition of various concentrations of benzene-1,3-diol (0-100 mM) in DMSO at 25 °C.

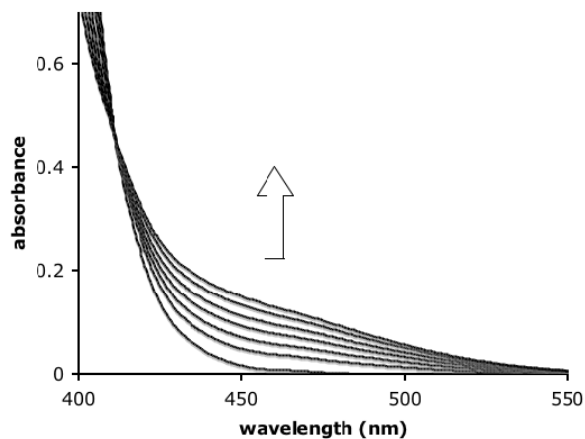

**Fig. S11** Portion of the UV-vis titration of 1·BF<sub>4</sub> ([1·BF<sub>4</sub>] = 2 mM) by addition of various concentrations of benzene-1,2-diol (0-100 mM) in DMSO at 25 °C.

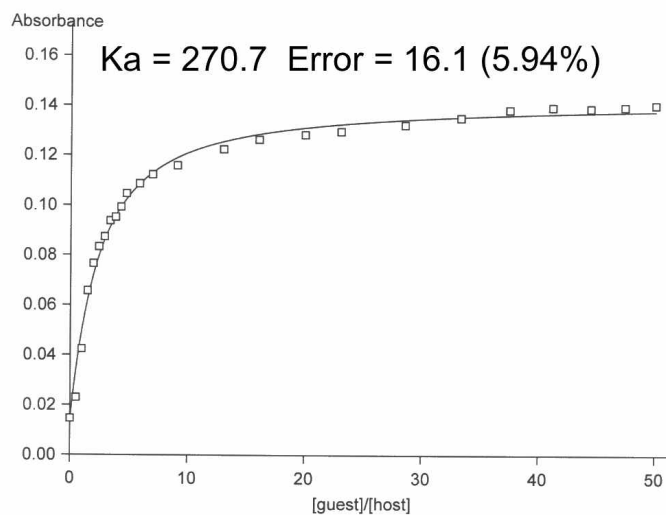

**Fig. S12** Fit plot for the UV-vis titration of 1·BF<sub>4</sub> with benzene-1,4-diol. [1·BF<sub>4</sub>] = 2 mM, DMSO, 25 °C.

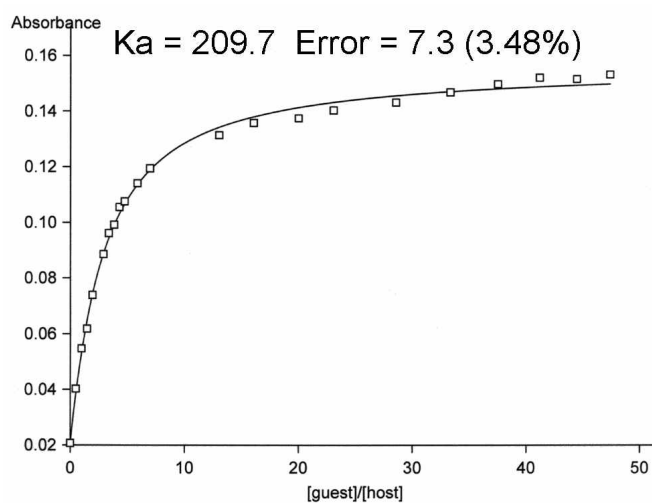

**Fig. S13** Fit plot for the UV-vis titration of 1·BF<sub>4</sub> with benzene-1,3-diol. [1·BF<sub>4</sub>] = 2 mM, DMSO, 25 °C.

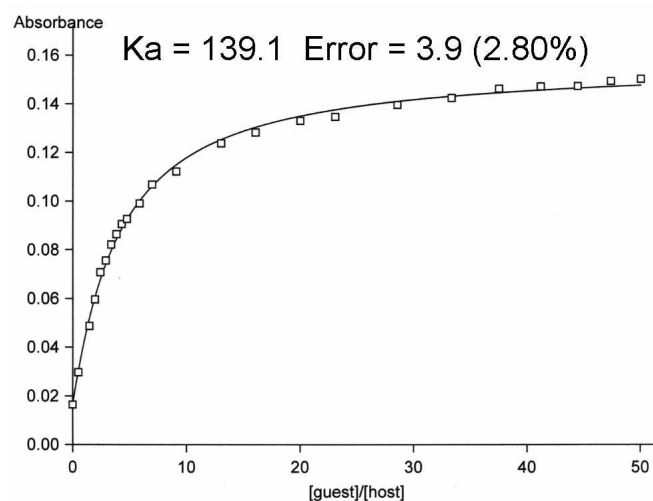

**Fig. S14** Fit plot for the UV-vis titration of  $1 \cdot \text{BF}_4$  with benzene-1,2-diol.  $[1 \cdot \text{BF}_4] = 2 \text{ mM}$ , DMSO,  $25 \text{ }^\circ\text{C}$ .

### Calculation of Electrostatic Potential Surfaces

The structure of  $1 \cdot \text{BF}_4$  was entered into *Spartan '04* by using the crystal structure data of  $1 \cdot \text{BF}_4 \cdot \text{benzene-1,3-diol}$  ( $1 \cdot \text{meta} \cdot \text{BF}_4$ ) saved in pdb format.

**Electrostatic Potential Surfaces** were calculated using the following settings:

*Properties*: total charge – 4+; multiplicity – singlet;

*Calculations*: calculate – single point energy; at – ground state; with – Density Functional – B3LYP – 6-31G\* – pseudopotential; start from – initial geometry.
